# Supplementary material
Source: publisher site journal article supplement (https://www.dovepress.com/article/497036)
Supplement: Supplementary file 1 [file get_supplementary_file.php]

| **Table S1**.Prevalence of chronic diseases or condition | | | | | |
| --- | --- | --- | --- | --- | --- |
| Components | Total | Men | | Women | P |
| Hypertension | 5811（70.8） | 2695（70.4） | 3116（71.2） | | 0.413 |
| Dyslipidemia | 3745（45.6） | 1537（40.1） | 2208（50.5） | | <0.001 |
| Diabetes | 1846（22.5） | 822（21.5） | 1024（23.4） | | 0.036 |
| Obesity | 1516（18.5） | 524（13.7） | 992（22.7） | | <0.001 |
| Liver disease | 1379（16.8） | 596（15.6） | 783（17.9） | | <0.001 |
| Anemia | 993（12.1） | 447（11.7） | 546（12.5） | | 0.266 |
| Kidney disease | 834（10.2） | 308（8.0） | 526（12.0） | | <0.001 |
| Biliary tract disease | 789（9.6） | 316（8.3） | 473（10.8） | | <0.001 |
| Cerebrovascular disease | 787（9.6） | 357（9.3） | 430（9.8） | | 0.44 |
| Heart disease | 593（7.2） | 281（7.3） | 312（7.1） | | 0.715 |
| Psychosomatic diseases | 124（1.5） | 26（0.7） | 98（2.2） | | <0.001 |
| Chronic lung disease | 73（0.9） | 40（1.0） | 33（0.8） | | 0.162 |
| Tumor | 59（0.7） | 17（0.4） | 42（1.0） | | 0.006 |
| Thyroid Diseases | 21（0.3） | 5（0.1） | 16（0.4） | | 0.036 |

| **Table S2.** Distribution (%) of the number of chronic diseases in study population (n = 8205) | | | |
| --- | --- | --- | --- |
| Number of diseases | Total | Men | Women |
| 0 | 761 (9.27) | 414 (10.81) | 347 (7.93) |
| 1 | 1961 (23.9) | 1062 (27.74) | 899 (20.54) |
| 2 | 2241 (27.31) | 1049 (27.40) | 1192 (27.24) |
| 3 | 1627 (19.83) | 693 (18.10) | 934 (21.34) |
| 4 | 1029 (12.54) | 391 (10.21) | 638 (14.60) |
| 5 | 419 (5.11) | 162 (4.23) | 257 (5.87) |
| 6 | 139 (1.69) | 51 (1.33) | 88 (2.01) |
| 7 | 24 (0.29) | 5 (0.13) | 19 (0.43) |
| 8 | 3 (0.04) | 1 (0.03) | 2 (0.05) |
| 9 | 1 (0.01) | 1 (0.03) | 0 (0.00) |

| **Table S3.** Logistic regression for the association between multimorbidity and sleep duration (OR,95%CI, P) | | | | |
| --- | --- | --- | --- | --- |
| Multimorbidity (no versus yes) | | | | |
|  |  | Unadjusted Model | Model 1 | Model 2 |
| Short sleep duration | total | 1.18 (1.05,1.32), 0.007 | 1.11 (0.98, 1.25), 0.096 | 1.13 (1.01,1.28), 0.041 |
| Men | 1.08 (0.91,1.28), 0.407 | 1.07 (0.90,1.28), 0.436 | 1.10 (0.92,1.31), 0.292 |
| Women | 1.16 (0.98,1.36), 0.077 | 1.14 (0.97,1.34), 0.118 | 1.15 (0.98,1.36), 0.088 |
| Prolonged sleep duration | total | 1.05 (0.87,1.26), 0.639 | 1.02 (0.84,1.23), 0.844 | 1.00(0.83,1.21), 0.996 |
| Men | 0.98 (0.76,1.27), 0.904 | 0.97 (0.75,1.25), 0.814 | 0.98 (0.74,1.26), 0.800 |
| Women | 1.12 (0.85,1.48), 0.433 | 1.08 (0.81,1.44), 0.580 | 1.06 (0.80,1.41), 0.703 |
| Model 1 was adjusted for age and sex (sex not for its stratification)；  Model 2 was further adjusted for education status, ethnicity, regions, marital status, cigarette use, alcohol use, physical activity;  Reference category is normal sleep duration (6-8 h) ; | | | | |
